# Supplementary material
Source: PubMed Central journal article supplement (PMC2673302)
Supplement: M807536200_1.pdf [file M807536200_1.pdf]

**Supplementary Figure.** Phospho-specific PDE3A antibody dot blot. Synthetic peptides (1  $\mu\text{g}$ ) corresponding to phosphorylated (P) and non-phosphorylated (NP) residues on PDE3A were spotted onto nitrocellulose and probed with 2  $\mu\text{g}/\text{ml}$  phospho-PDE3A antibodies containing a 100-fold excess of competing unphosphorylated peptide.

Supplementary Data

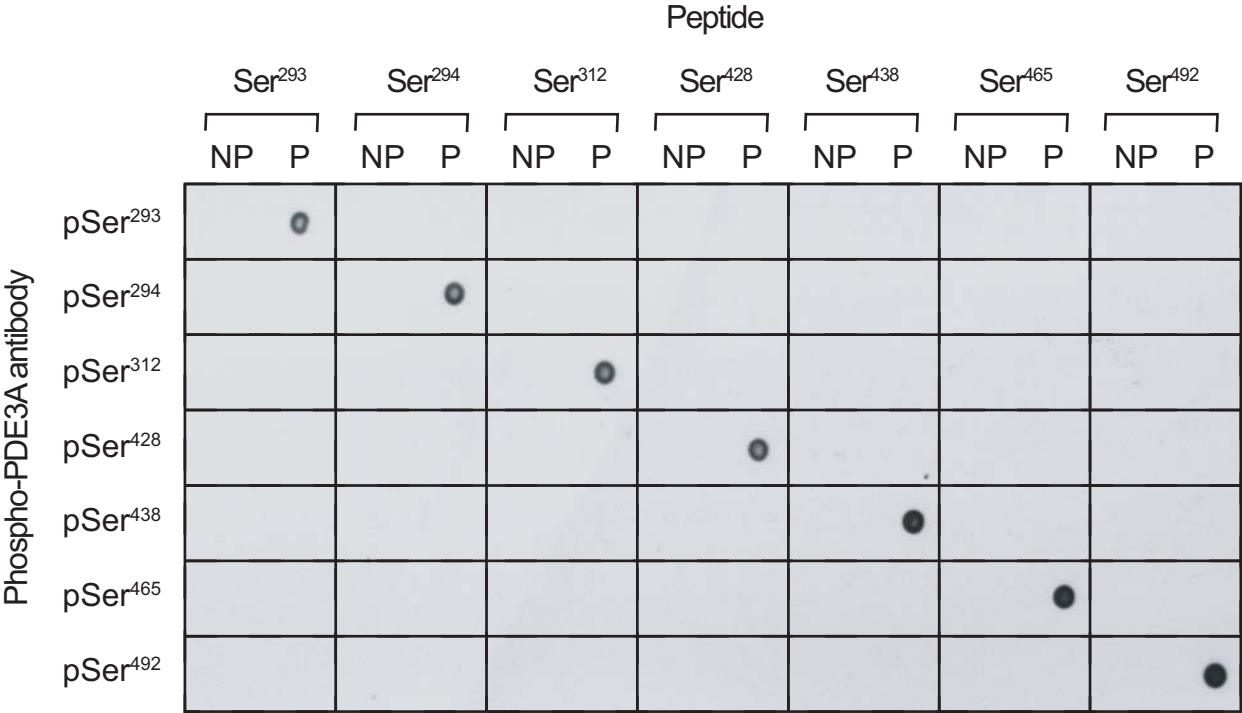

NP - nonphospho  
P - Phospho
